# Supplementary material
Source: publisher site journal article supplement (https://www.dovepress.com/article/491203)
Supplement: Supplementary file 1 [file get_supplementary_file.php]

*
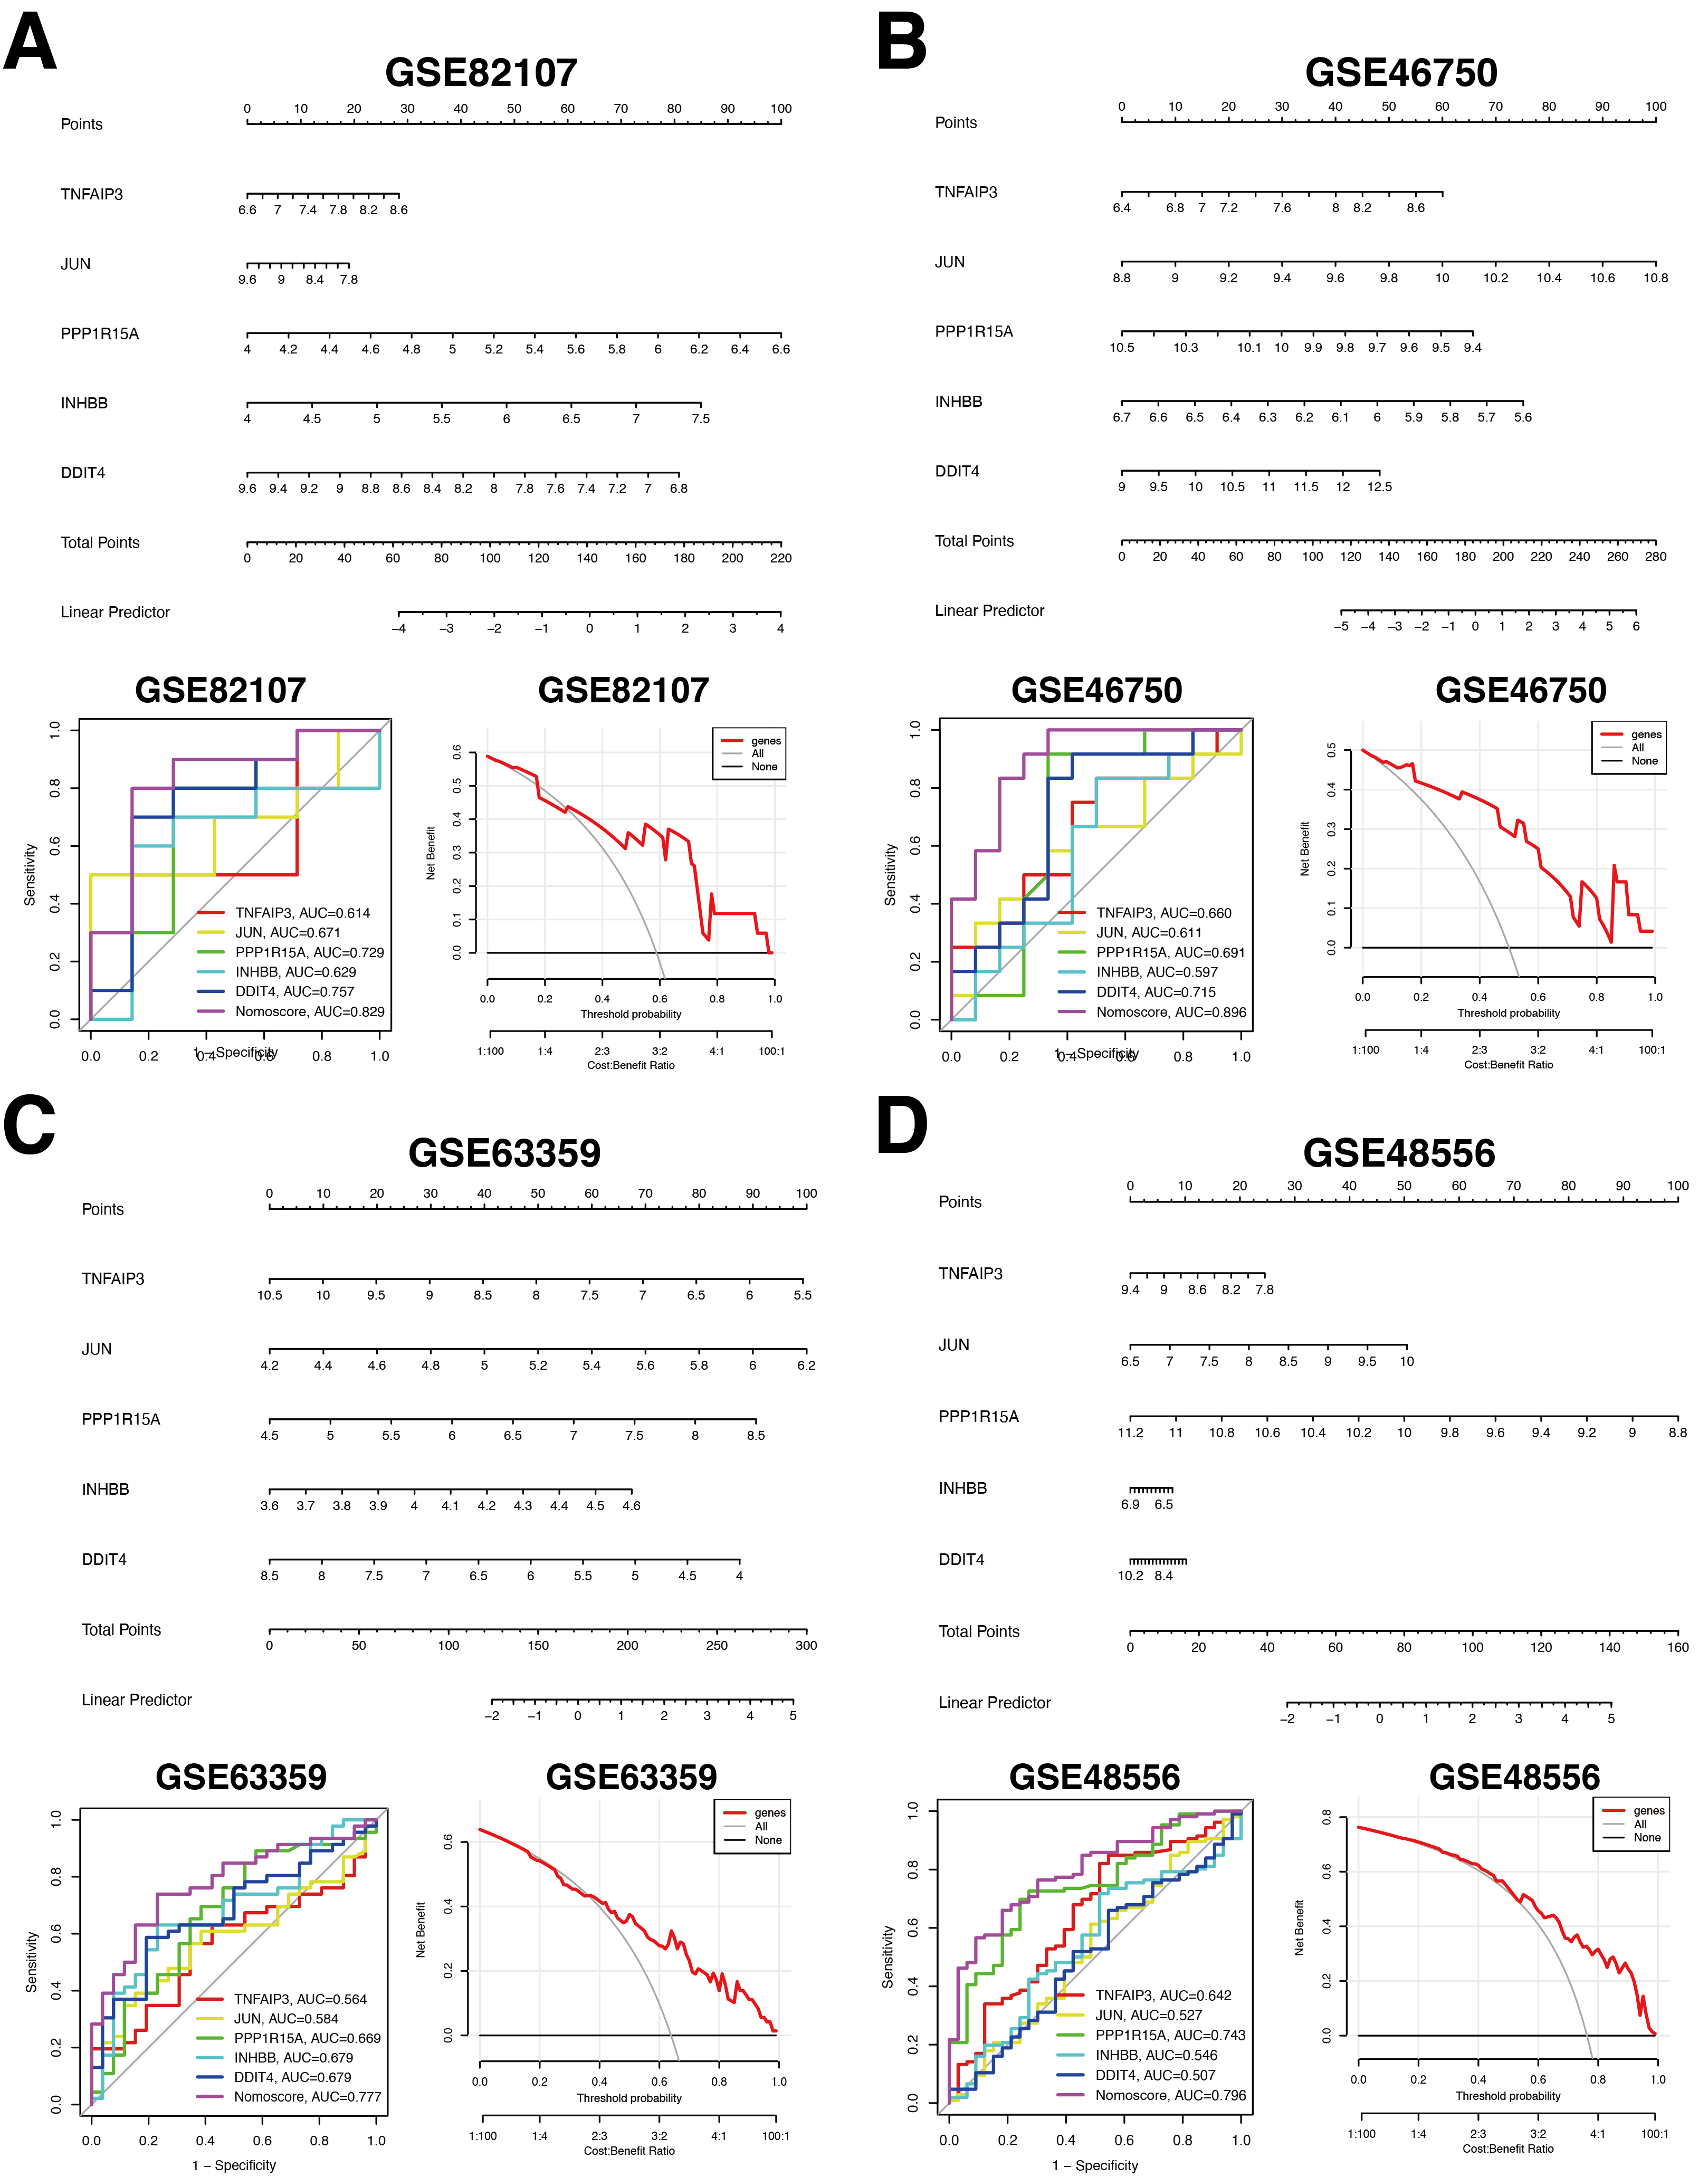
*

**Figure S1**

**(A-D)**ROC and clinical decision curve analysis of Hub PCD-DEGs and Nomogram in GSE821079, GSE46750, GSE63359, and GSE48556 datasets.


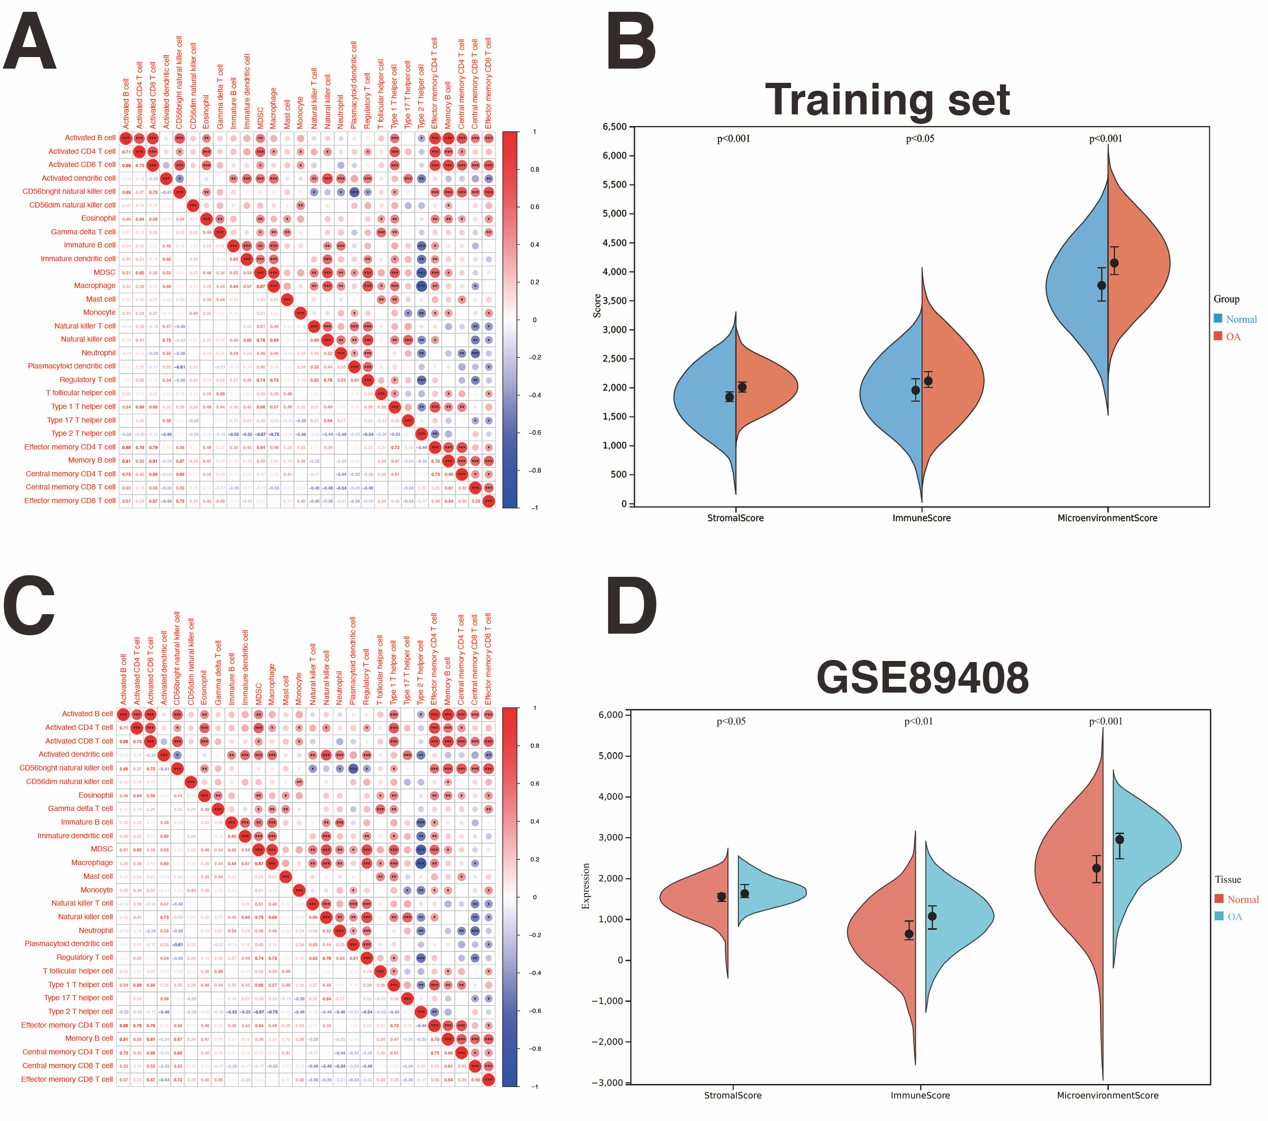


**Figure S2**

**(A, C)** Analysis of the correlation between immune cells and immune function in training sets and the GSE89408 dataset. **(B, D)** ESTIMATE Scores in Training Sets and the GSE89408 dataset.


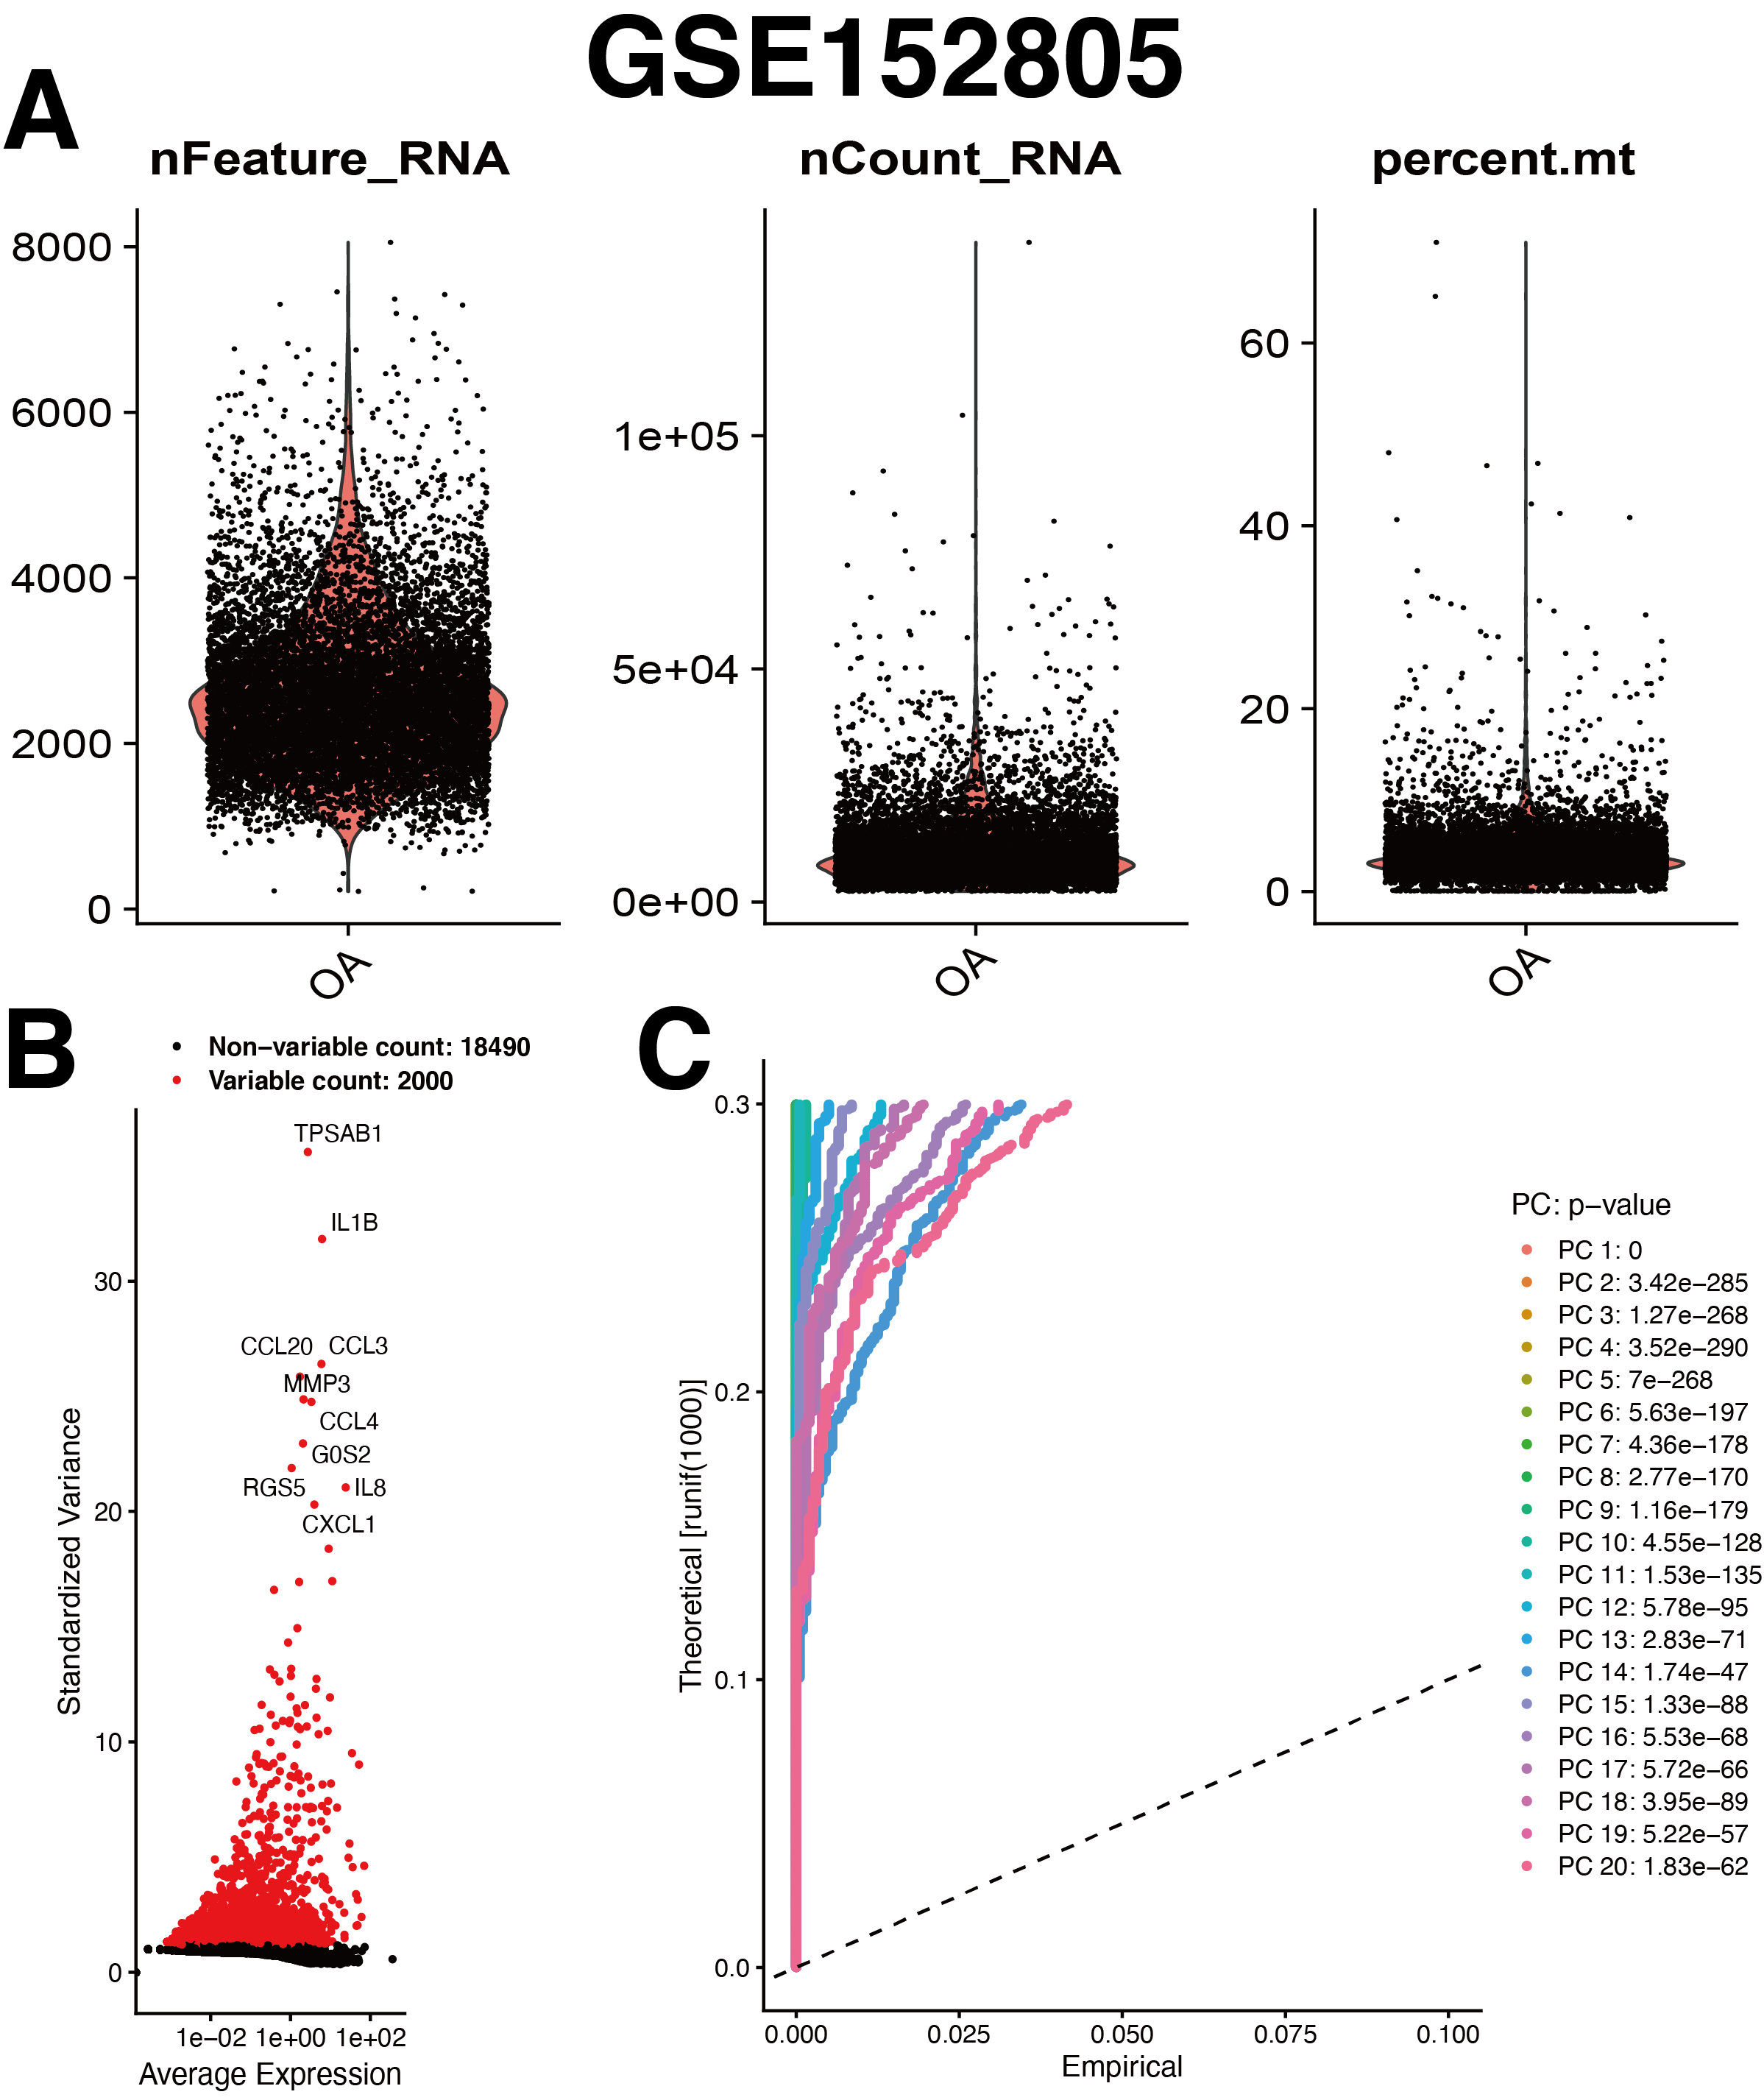


**Figure S3**

**(A)** Quality control of the GSE152805 dataset involved assessing the number of genes per cell (nFeature_RNA), the number of unique molecular identifiers (UMIs) per cell (nCount_RNA), and the percentage of mitochondrial genes per cell (percent.mt). **(B)** High variability gene screening yielded a selection of the top 2000 highly variable genes, represented by the red dots in the plot. **(C)** The principal components of the highest-ranked 20 cells and their respective P-values.


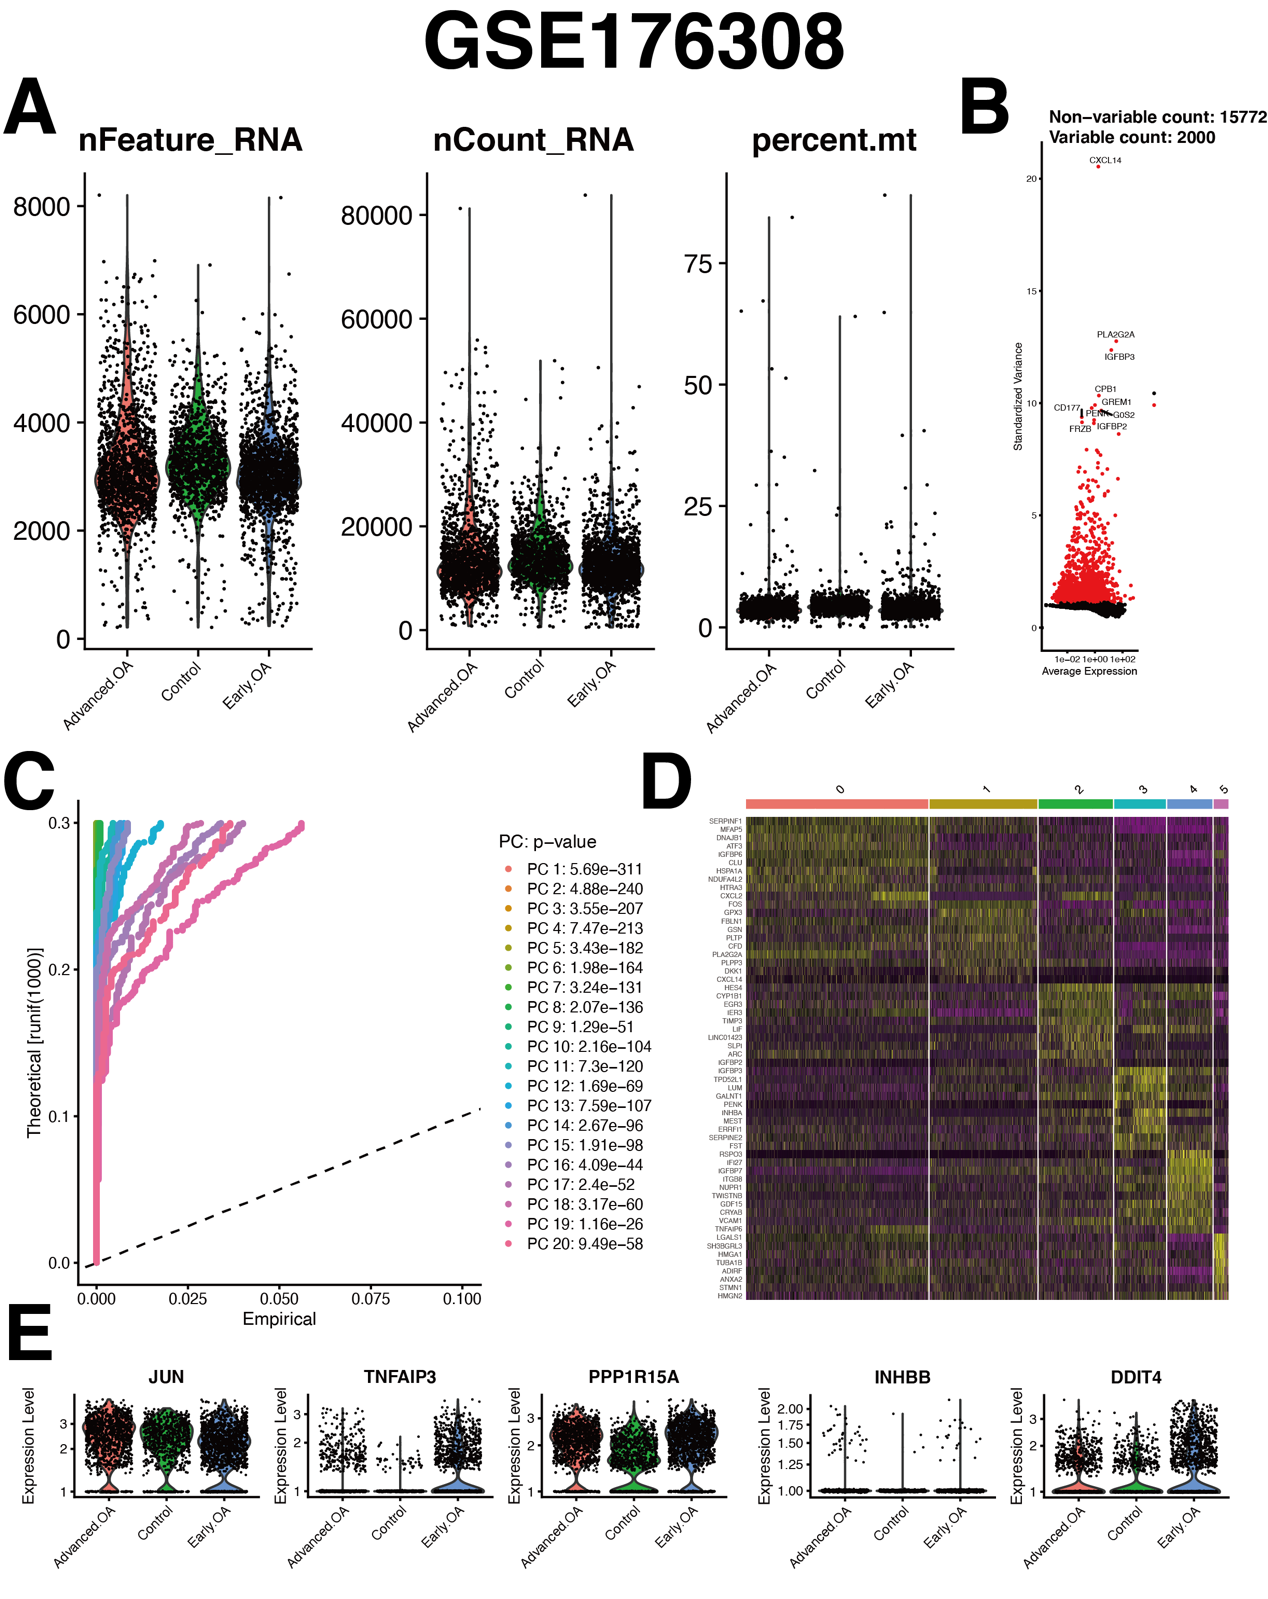


**Figure S4**

**(A)** Quality control of the GSE176308 dataset. **(B)** Screening of highly variable genes in the GSE176308 dataset. **(C)** The principal components of the top 20 ranked cells of the GSE176308 dataset and their respective P-values. **(D)** Heatmap of top 10 marker gene expression in different cell clusters of the GSE176308 dataset **(E)** Violin plots showing the distribution of Hub-PCD DEGs in various cell types in the GSE176308 dataset.

| Table S1. List of PCD-related genes | | | | | | |
| --- | --- | --- | --- | --- | --- | --- |
|  | Apoptosis | Autophagy | Necroptosis | Pyroptosis | Ferroptosis | Cuproptosis |
| 1 | AATF | AMBRA1 | FADD | BAK1 | ACSL1 | FDX1 |
| 2 | ABL1 | APOL1 | FAS | BAX | ACSL3 | LIAS |
| 3 | ACAA2 | ARNT | FASLG | CASP1 | ACSL4 | LIPT1 |
| 4 | ACKR3 | ARSA | MLKL | CASP3 | ACSL5 | DLD |
| 5 | ACVR1 | ARSB | RIPK1 | CASP4 | ACSL6 | DLAT |
| 6 | ACVR1B | ATF4 | RIPK3 | CASP5 | AIFM2 | PDHA1 |
| 7 | ADORA1 | ATF6 | TLR3 | CHMP2A | AKR1C1 | PDHB |
| 8 | ADORA2A | ATG10 | TNF | CHMP2B | AKR1C2 | SLC31A1 |
| 9 | AEN | ATG12 | GLUD1 | CHMP3 | AKR1C3 | MTF1 |
| 10 | AGT | ATG16L1 | GLUD2 | CHMP4A | ALOX15 | GLS |
| 11 | AGTR2 | ATG16L2 | ALOX15 | CHMP4B | ATG5 | CDKN2A |
| 12 | AIFM1 | ATG2A | FTH1 | CHMP4C | ATG7 | DNA2 |
| 13 | AKT1 | ATG2B | PYG | CHMP6 | BACH1 | NTHL1 |
| 14 | ANXA6 | ATG3 | CAPN1 | CHMP7 | CBS | POLE |
| 15 | APAF1 | ATG4A | CASP1 | CYCS | CHMP5 | POLD1 |
| 16 | AR | ATG4B | GLNA | ELANE | CHMP6 | CISD1 |
| 17 | ARHGEF2 | ATG4C | BAX | GSDMD | CISD1 | GLRX5 |
| 18 | ARL6IP5 | ATG4D | BCL2 | GSDME | COQ2 | PPAT |
| 19 | ARMC10 | ATG5 | FADD | GZMB | CP | RTEL1 |
| 20 | ARRB2 | ATG7 | RIPK1 | HMGB1 | CTH | ELP3 |
| 21 | ASAH2 | ATG9A | TNF | IL18 | CYBB | CDK5RAP1 |
| 22 | ATAD5 | ATG9B | TNFRSF1A | IL1A | DPP4 | ISCA2 |
| 23 | ATF2 | ATIC | TRADD | IL1B | FDFT1 | ETFDH |
| 24 | ATF3 | BAG1 | TRAF2 | IRF1 | FTH1 | NFE2L2 |
| 25 | ATF4 | BAG3 | PPIA | IRF2 | FTL | NLRP3 |
| 26 | ATM | BAK1 | CAPN2 | TP53 | FTMT | ATP7B |
| 27 | ATP2A1 | BAX | HSP90A | TP63 | GCH1 | ATP7A |
| 28 | ATP2A3 | BCL2 | IL1A | BAK1 | GCLC | LIPT2 |
| 29 | ATP5IF1 | BCL2L1 | TNFSF6 | BAX | GCLM | DBT |
| 30 | AVP | BECN1 | TNFRSF6 | CASP1 | GPX4 | GCSH |
| 31 | BAD | BID | CASP8 | CASP3 | GSS | DLST |
| 32 | BAG3 | BIRC5 | JNK | CASP4 | HMGCR |  |
| 33 | BAG5 | BIRC6 | JAK2 | CASP5 | HMOX1 |  |
| 34 | BAG6 | BNIP1 | CAMK2 | CASP6 | HSPB1 |  |
| 35 | BAK1 | BNIP3 | IL1B | CASP8 | IREB2 |  |
| 36 | BAX | BNIP3L | IFNG | CASP9 | LPCAT3 |  |
| 37 | BBC3 | C12orf44 | STAT3 | CHMP2A | MAP1LC3A |  |
| 38 | BCAP31 | C17orf88 | IRF9 | CHMP2B | MAP1LC3B |  |
| 39 | BCL10 | CALCOCO2 | TNFSF10 | CHMP3 | MAP1LC3C |  |
| 40 | BCL2 | CAMKK2 | TNFRSF10A | CHMP4A | NCOA4 |  |
| 41 | BCL2A1 | CANX | TNFRSF10B | CHMP4B | NOX1 |  |
| 42 | BCL2L1 | CAPN1 | CFLAR | CHMP4C | NOX4 |  |
| 43 | BCL2L10 | CAPN10 | XIAP | CHMP6 | PCBP1 |  |
| 44 | BCL2L11 | CAPN2 | BID | CHMP7 | PCBP2 |  |
| 45 | BCL2L12 | CAPNS1 | AIFM1 | CYCS | PHKG2 |  |
| 46 | BCL2L14 | CASP1 | TRPM7 | ELANE | POR |  |
| 47 | BCL2L2 | CASP3 | IFNAR1 | GPX4 | PRNP |  |
| 48 | BCL3 | CASP4 | IFNAR2 | GSDMB | SAT1 |  |
| 49 | BCLAF1 | CASP8 | IFNGR1 | GSDMC | SAT2 |  |
| 50 | BDKRB2 | CCL2 | IFNGR2 | GSDMD | SLC11A2 |  |
| 51 | BDNF | CCR2 | TLR3 | GSDME | SLC1A5 |  |
| 52 | BECN1 | CD46 | TIRP | GZMB | SLC38A1 |  |
| 53 | BEX3 | CDKN1A | IFNA | HMGB1 | SLC39A14 |  |
| 54 | BID | CDKN1B | IFNB | IL18 | SLC39A8 |  |
| 55 | BIK | CDKN2A | TRIF | IL1A | SLC3A2 |  |
| 56 | BIRC6 | CFLAR | VDAC1 | IL1B | SLC40A1 |  |
| 57 | BLOC1S2 | CHMP2B | SLC25A4S | IRF1 | SLC7A11 |  |
| 58 | BMF | CHMP4B | PPID | IRF2 | STEAP3 |  |
| 59 | BMI1 | CLN3 | CYLD | NLRC4 | TF |  |
| 60 | BMP4 | CTSB | RIPK3 | NLRP1 | TFRC |  |
| 61 | BMP5 | CTSD | MLKL | NLRP2 | TP53 |  |
| 62 | BMPR1B | CTSL1 | TRAF5 | NLRP3 | TXNRD1 |  |
| 63 | BNIP3 | CX3CL1 | TLR4 | NLRP6 | VDAC2 |  |
| 64 | BNIP3L | CXCR4 | RBCK1 | NLRP7 | VDAC3 |  |
| 65 | BOK | DAPK1 | HMGB1 | NOD1 | RPL8 |  |
| 66 | BRCA1 | DAPK2 | JAK1 | PLCG1 | ATP5MC3 |  |
| 67 | BRCA2 | DDIT3 | JAK3 | PJVK | CS |  |
| 68 | BRSK2 | DIRAS3 | TYK2 | PRKACA | EMC2 |  |
| 69 | BTK | DLC1 | STAT1 | PYCARD | ACSF2 |  |
| 70 | C8orf44-SGK3 | DNAJB1 | STAT2 | SCAF11 | NOX3 |  |
| 71 | CAAP1 | DNAJB9 | STAT4 | TINAP | NOX5 |  |
| 72 | CASP1 | DRAM1 | STAT5A | TNF | DUOX1 |  |
| 73 | CASP10 | EDEM1 | STAT5B | TP53 | DUOX2 |  |
| 74 | CASP12 | EEF2 | STAT6 | TP63 | G6PD |  |
| 75 | CASP2 | EEF2K | H2A | AIM2 | PGD |  |
| 76 | CASP3 | EGFR | TNFAIP3 | GSDMA | PIK3CA |  |
| 77 | CASP4 | EIF2AK2 | RNF31 | IL6 | FLT3 |  |
| 78 | CASP5 | EIF2AK3 | CHMP2A | NOD2 | SCP2 |  |
| 79 | CASP6 | EIF2S1 | CHMP2B | TIRAP | NRAS |  |
| 80 | CASP8 | EIF4EBP1 | VPS24 |  | KRAS |  |
| 81 | CASP8AP2 | EIF4G1 | CHMP4A |  | HRAS |  |
| 82 | CASP9 | ERBB2 | CHMP4B |  | TFR2 |  |
| 83 | CAV1 | ERN1 | CHMP6 |  | GLS2 |  |
| 84 | CCAR2 | ERO1L | VPS4 |  | GOT1 |  |
| 85 | CD24 | FADD | CHMP1 |  | CARS1 |  |
| 86 | CD27 | FAM48A | CHMP5 |  | ALOX5 |  |
| 87 | CD28 | FAS | SMPD1 |  | KEAP1 |  |
| 88 | CD38 | FKBP1A | PYCARD |  | ALOX12 |  |
| 89 | CD3E | FKBP1B | NLRP3 |  | ALOX12B |  |
| 90 | CD44 | FOS | ZBP1 |  | ALOX15B |  |
| 91 | CD5 | FOXO1 | IL33 |  | ALOXE3 |  |
| 92 | CD70 | FOXO3 | FTL |  | ACO1 |  |
| 93 | CD74 | GAA | SQSTM1 |  | G6PDX |  |
| 94 | CDIP1 | GAA | VDAC2 |  | ULK1 |  |
| 95 | CDKN1A | GABARAP | VDAC3 |  | ATG3 |  |
| 96 | CDKN2D | GABARAP | CHMP7 |  | ATG4D |  |
| 97 | CEBPB | GABARAPL1 | PGAM5 |  | BECN1 |  |
| 98 | CFLAR | GABARAPL1 | BIRC2 |  | GABARAPL2 |  |
| 99 | CHAC1 | GABARAPL2 | BIRC3 |  | GABARAPL1 |  |
| 100 | CHCHD10 | GABARAPL2 | EIF2AK2 |  | ATG16L1 |  |
| 101 | CHEK2 | GAPDH | PLA2G4 |  | WIPI1 |  |
| 102 | CIB1 | GAPDH | DNM1L |  | WIPI2 |  |
| 103 | CIDEB | GNAI3 | SPATA2 |  | SNX4 |  |
| 104 | CLU | GNAI3 | FAF1 |  | ATG13 |  |
| 105 | COA8 | GNB2L1 | SHARPIN |  | ULK2 |  |
| 106 | COL2A1 | GNB2L1 | NOX2 |  | EGFR |  |
| 107 | CRADD | GOPC | USP21 |  | MAPK3 |  |
| 108 | CREB3 | GOPC | PARP1 |  | MAPK1 |  |
| 109 | CREB3L1 | GRID1 | CHMP4C |  | BID |  |
| 110 | CRIP1 | GRID1 |  |  | ZEB1 |  |
| 111 | CSF2 | GRID2 |  |  | CDKN2A |  |
| 112 | CSNK2A1 | GRID2 |  |  | PEBP1 |  |
| 113 | CSNK2A2 | HDAC1 |  |  | SOCS1 |  |
| 114 | CTH | HDAC6 |  |  | CDO1 |  |
| 115 | CTNNA1 | HGS |  |  | MYB |  |
| 116 | CTNNB1 | HIF1A |  |  | MAPK8 |  |
| 117 | CTSC | HSP90AB1 |  |  | MAPK9 |  |
| 118 | CTSH | HSPA5 |  |  | CHAC1 |  |
| 119 | CTTN | HSPA8 |  |  | MAPK14 |  |
| 120 | CUL1 | HSPB8 |  |  | LINC00472 |  |
| 121 | CUL2 | IFNG |  |  | PRKAA2 |  |
| 122 | CUL3 | IKBKB |  |  | PRKAA1 |  |
| 123 | CUL4A | IKBKE |  |  | ELAVL1 |  |
| 124 | CUL5 | IL24 |  |  | BAP1 |  |
| 125 | CX3CL1 | IRGM |  |  | ABCC1 |  |
| 126 | CX3CR1 | ITGA3 |  |  | MIR6852 |  |
| 127 | CXCL12 | ITGA6 |  |  | ACVR1B |  |
| 128 | CYCS | ITGB1 |  |  | TGFBR1 |  |
| 129 | CYLD | ITGB4 |  |  | EPAS1 |  |
| 130 | CYP1B1 | ITPR1 |  |  | HILPDA |  |
| 131 | DAB2IP | KIAA0226 |  |  | HIF1A |  |
| 132 | DAP | KIAA0652 |  |  | IFNG |  |
| 133 | DAP3 | KIAA0831 |  |  | ANO6 |  |
| 134 | DAPK1 | KIF5B |  |  | LPIN1 |  |
| 135 | DAPK2 | KLHL24 |  |  | HMGB1 |  |
| 136 | DAPK3 | LAMP1 |  |  | TNFAIP3 |  |
| 137 | DAPL1 | LAMP2 |  |  | TLR4 |  |
| 138 | DAXX | MAP1LC3A |  |  | ATF3 |  |
| 139 | DBH | MAP1LC3B |  |  | ATM |  |
| 140 | DDIAS | MAP1LC3C |  |  | YY1AP1 |  |
| 141 | DDIT3 | MAP2K7 |  |  | EGLN2 |  |
| 142 | DDIT4 | MAPK1 |  |  | MIOX |  |
| 143 | DDX3X | MAPK3 |  |  | TAZ |  |
| 144 | DDX47 | MAPK8 |  |  | MTDH |  |
| 145 | DDX5 | MAPK8IP1 |  |  | IDH1 |  |
| 146 | DEDD | MAPK9 |  |  | SIRT1 |  |
| 147 | DEDD2 | MBTPS2 |  |  | FBXW7 |  |
| 148 | DELE1 | MLST8 |  |  | PANX1 |  |
| 149 | DEPTOR | MTMR14 |  |  | DNAJB6 |  |
| 150 | DIABLO | MTOR |  |  | LONP1 |  |
| 151 | DIDO1 | MYC |  |  | CD82 |  |
| 152 | DNAJA1 | NAF1 |  |  | IL1B |  |
| 153 | DNAJC10 | NAMPT |  |  | CTSB |  |
| 154 | DNM1L | NBR1 |  |  | CYB5R1 |  |
| 155 | DPF2 | NCKAP1 |  |  | ELOVL5 |  |
| 156 | DYRK2 | NFE2L2 |  |  | FADS1 |  |
| 157 | E2F1 | NFKB1 |  |  | FBW7 |  |
| 158 | E2F2 | NKX2-3 |  |  | PTEN |  |
| 159 | EDA2R | NLRC4 |  |  | NR1D1 |  |
| 160 | EEF1E1 | NPC1 |  |  | NR1D2 |  |
| 161 | EIF2AK3 | NRG1 |  |  | TBK1 |  |
| 162 | EIF5A | NRG2 |  |  | IL6 |  |
| 163 | ELL3 | NRG3 |  |  | USP7 |  |
| 164 | ENO1 | P4HB |  |  | miR-182-5p |  |
| 165 | EP300 | PARK2 |  |  | miR-378a-3p |  |
| 166 | EPHA2 | PARP1 |  |  | ATF4 |  |
| 167 | EPO | PEA15 |  |  | AQP3 |  |
| 168 | ERBB3 | PELP1 |  |  | AQP5 |  |
| 169 | ERCC6 | PEX14 |  |  | AQP8 |  |
| 170 | ERN1 | PEX3 |  |  | LINC00618 |  |
| 171 | ERN2 | PIK3C3 |  |  | MT1DP |  |
| 172 | ERO1A | PIK3R4 |  |  | PEX10 |  |
| 173 | ERP29 | PINK1 |  |  | AGPAT3 |  |
| 174 | EYA1 | PPP1R15A |  |  | PEX12 |  |
| 175 | EYA2 | PRKAB1 |  |  | CHP1 |  |
| 176 | EYA3 | PRKAR1A |  |  | GPAT4 |  |
| 177 | EYA4 | PRKCD |  |  | BRPF1 |  |
| 178 | FADD | PRKCQ |  |  | OSBPL9 |  |
| 179 | FAF1 | PTEN |  |  | INTS2 |  |
| 180 | FAIM | PTK6 |  |  | MMD |  |
| 181 | FAIM2 | RAB11A |  |  | CYP4F8 |  |
| 182 | FAM162A | RAB1A |  |  | MLLT1 |  |
| 183 | FAS | RAB24 |  |  | TTPA |  |
| 184 | FASLG | RAB33B |  |  | GRIA3 |  |
| 185 | FASTK | RAB5A |  |  | EPT1 |  |
| 186 | FBH1 | RAB7A |  |  | POM121L12 |  |
| 187 | FBXW7 | RAC1 |  |  | LIG3 |  |
| 188 | FEM1B | RAF1 |  |  | AEBP2 |  |
| 189 | FGA | RB1 |  |  | AGPS |  |
| 190 | FGB | RB1CC1 |  |  | CDCA3 |  |
| 191 | FGF10 | RELA |  |  | PEX2 |  |
| 192 | FGFR1 | RGS19 |  |  | PEX6 |  |
| 193 | FGFR3 | RHEB |  |  | TIMM9 |  |
| 194 | FGG | RPS6KB1 |  |  | DCAF7 |  |
| 195 | FHIT | RPTOR |  |  | LCE2C |  |
| 196 | FIGNL1 | SAR1A |  |  | FAR1 |  |
| 197 | FIS1 | SERPINA1 |  |  | PHF21A |  |
| 198 | FLCN | SESN2 |  |  | SMAD7 |  |
| 199 | FNIP2 | SH3GLB1 |  |  | LYRM1 |  |
| 200 | FOXO3 | SIRT1 |  |  | AMN |  |
| 201 | FXN | SIRT2 |  |  | PEX3 |  |
| 202 | FZD9 | SPHK1 |  |  | MTCH1 |  |
| 203 | G0S2 | SPNS1 |  |  | ACADSB |  |
| 204 | GABARAP | SQSTM1 |  |  | PVT1 |  |
| 205 | GATA1 | ST13 |  |  | hsa_circ_0008367 |  |
| 206 | GATA4 | STK11 |  |  | MAP3K11 |  |
| 207 | GCLC | TBK1 |  |  | GSK3B |  |
| 208 | GCLM | TM9SF1 |  |  | BRD7 |  |
| 209 | GDNF | TMEM49 |  |  | SLC25A28 |  |
| 210 | GFRAL | TMEM74 |  |  | MFN2 |  |
| 211 | GGCT | TNFSF10 |  |  | ZFAS1 |  |
| 212 | GHITM | TP53 |  |  | TSC1 |  |
| 213 | GNAI2 | TP53INP2 |  |  | TGFB1 |  |
| 214 | GNAI3 | TP63 |  |  | SNCA |  |
| 215 | GPER1 | TP73 |  |  | SIRT3 |  |
| 216 | GPX1 | TSC1 |  |  | CGAS |  |
| 217 | GRINA | TSC2 |  |  | STING1 |  |
| 218 | GSDME | TUSC1 |  |  | HDDC3 |  |
| 219 | GSK3A | ULK1 |  |  | MIR761 |  |
| 220 | GSK3B | ULK2 |  |  | MDM2 |  |
| 221 | GSKIP | ULK3 |  |  | MDM4 |  |
| 222 | GSTP1 | USP10 |  |  | MIR214 |  |
| 223 | GZMB | UVRAG |  |  | DLD |  |
| 224 | HDAC1 | VAMP3 |  |  | WWTR1 |  |
| 225 | HELLS | VAMP7 |  |  | PRKCA |  |
| 226 | HERPUD1 | VEGFA |  |  | LGMN |  |
| 227 | HGF | WDFY3 |  |  | SMPD1 |  |
| 228 | HIC1 | WDR45 |  |  | MYCN |  |
| 229 | HIF1A | WDR45L |  |  | IFNA1 |  |
| 230 | HINT1 | WIPI1 |  |  | IFNA2 |  |
| 231 | HIP1 | WIPI2 |  |  | IFNA4 |  |
| 232 | HIP1R | ZFYVE1 |  |  | IFNA5 |  |
| 233 | HIPK1 | AMBRA1 |  |  | IFNA6 |  |
| 234 | HIPK2 | ARL13B |  |  | IFNA7 |  |
| 235 | HMGB2 | ATG10 |  |  | IFNA8 |  |
| 236 | HMOX1 | ATG101 |  |  | IFNA10 |  |
| 237 | HNRNPK | ATG12 |  |  | IFNA13 |  |
| 238 | HRAS | ATG13 |  |  | IFNA14 |  |
| 239 | HRK | ATG14 |  |  | IFNA16 |  |
| 240 | HSPA1A | ATG16L1 |  |  | IFNA17 |  |
| 241 | HSPA1B | ATG3 |  |  | IFNA21 |  |
| 242 | HSPB1 | ATG4A |  |  | SMG9 |  |
| 243 | HTRA2 | ATG4B |  |  | PPARG |  |
| 244 | HTT | ATG4C |  |  | miR-335 |  |
| 245 | HYAL2 | ATG4D |  |  | SNX5 |  |
| 246 | HYOU1 | ATG5 |  |  | PAQR3 |  |
| 247 | ICAM1 | ATG7 |  |  | MICU1 |  |
| 248 | IFI16 | ATG9A |  |  | TOR2A |  |
| 249 | IFI27 | ATG9B |  |  | MIR375 |  |
| 250 | IFI27L1 | ATM |  |  | MAP3K14 |  |
| 251 | IFI27L2 | BECN1 |  |  | CircKDM4C |  |
| 252 | IFI6 | CETN1 |  |  | MIR324 |  |
| 253 | IFNB1 | CFTR |  |  | QSOX1 |  |
| 254 | IFNG | CHMP2A |  |  | MIB2 |  |
| 255 | IGF1 | CHMP2B |  |  | CLTRN |  |
| 256 | IKBKE | CHMP3 |  |  | KLF2 |  |
| 257 | IL12A | CHMP4A |  |  | MIR5096 |  |
| 258 | IL19 | CHMP4B |  |  | HOTAIR |  |
| 259 | IL1A | CHMP4C |  |  | H19 |  |
| 260 | IL1B | CHMP6 |  |  | FOXO4 |  |
| 261 | IL2 | CHMP7 |  |  | YTHDC2 |  |
| 262 | IL20RA | CSNK2A1 |  |  | DDR2 |  |
| 263 | IL33 | CSNK2A2 |  |  | SLC39A7 |  |
| 264 | IL4 | CSNK2B |  |  | TRIM46 |  |
| 265 | IL6R | DYNC1H1 |  |  | KDM5A |  |
| 266 | IL7 | DYNC1I1 |  |  | TRIM21 |  |
| 267 | IL9 | DYNC1I2 |  |  | DPEP1 |  |
| 268 | ING2 | DYNC1LI1 |  |  | CYGB |  |
| 269 | ING5 | DYNC1LI2 |  |  | IDO1 |  |
| 270 | INHBA | DYNLL1 |  |  | GSTZ1 |  |
| 271 | INHBB | DYNLL2 |  |  | GJA1 |  |
| 272 | INS | EEF1A1 |  |  | PGRMC1 |  |
| 273 | ITGA6 | EPAS1 |  |  | CIRBP |  |
| 274 | ITGAM | FUNDC1 |  |  | circPSEN1 |  |
| 275 | ITGAV | GABARAP |  |  | USP11 |  |
| 276 | ITM2C | GABARAPL1 |  |  | YAP |  |
| 277 | ITPR1 | GABARAPL2 |  |  | MIR135B |  |
| 278 | ITPRIP | GFAP |  |  | TRIM26 |  |
| 279 | IVNS1ABP | HBB |  |  | NDRG1 |  |
| 280 | JAK2 | HDAC6 |  |  | MIR302A |  |
| 281 | JMY | HSF1 |  |  | ASMTL-AS1 |  |
| 282 | KDM1A | HSP90AA1 |  |  | FADS2 |  |
| 283 | KITLG | HSP90AB1 |  |  | PIEZO1 |  |
| 284 | KRT18 | HSPA8 |  |  | LIFR |  |
| 285 | LCK | IFT88 |  |  | PTPN6 |  |
| 286 | LGALS12 | LAMP2 |  |  | MIR15A |  |
| 287 | LGALS3 | LAMTOR1 |  |  | EGR1 |  |
| 288 | LMNA | LAMTOR2 |  |  | ADAM23 |  |
| 289 | LRRK2 | LAMTOR3 |  |  | ARHGEF26-AS1 |  |
| 290 | LTBR | LAMTOR4 |  |  | CPEB1 |  |
| 291 | MADD | LAMTOR5 |  |  | COX4I2 |  |
| 292 | MAEL | MAP1LC3A |  |  | lncRNA AABR07017145.1 |  |
| 293 | MAGEA3 | MAP1LC3B |  |  | TIMP1 |  |
| 294 | MAGED1 | MAP1LC3C |  |  | KDM6B |  |
| 295 | MAL | MFN1 |  |  | METTL14 |  |
| 296 | MAP2K5 | MFN2 |  |  | MIB1 |  |
| 297 | MAP3K5 | MLST8 |  |  | KDM5C |  |
| 298 | MAPK7 | MTERF3 |  |  | MEG3 |  |
| 299 | MAPK8 | MTMR14 |  |  | CCDC6 |  |
| 300 | MAPK8IP1 | MTMR3 |  |  | CFL1 |  |
| 301 | MAPK8IP2 | MTOR |  |  | MIR539 |  |
| 302 | MAPK9 | MVB12A |  |  | KMT2D |  |
| 303 | MARCHF7 | MVB12B |  |  | RB1 |  |
| 304 | MAZ | NBR1 |  |  | HSF1 |  |
| 305 | MCL1 | PARK7 |  |  | NFE2L2 |  |
| 306 | MDM2 | PCNT |  |  | SQSTM1 |  |
| 307 | MEIS3 | PEX5 |  |  | NQO1 |  |
| 308 | MELK | PGAM5 |  |  | MUC1 |  |
| 309 | METTL21C | PIK3C3 |  |  | MT1G |  |
| 310 | MFF | PIK3R4 |  |  | FANCD2 |  |
| 311 | MIF | PINK1 |  |  | HSPA5 |  |
| 312 | MIR132 | PLIN2 |  |  | HELLS |  |
| 313 | MIR15A | PLIN3 |  |  | SCD |  |
| 314 | MIR16-1 | PRKAA1 |  |  | SRC |  |
| 315 | MIR17 | PRKAA2 |  |  | STAT3 |  |
| 316 | MIR186 | PRKAB1 |  |  | PML |  |
| 317 | MIR198 | PRKAB2 |  |  | MTOR |  |
| 318 | MIR21 | PRKAG1 |  |  | NFS1 |  |
| 319 | MIR210 | PRKAG2 |  |  | TP63 |  |
| 320 | MIR221 | PRKAG3 |  |  | CDKN1A |  |
| 321 | MIR222 | PRKN |  |  | MIR137 |  |
| 322 | MIR26B | RB1CC1 |  |  | ENPP2 |  |
| 323 | MIR27B | RHEB |  |  | FH |  |
| 324 | MIR449A | RNASE1 |  |  | CISD2 |  |
| 325 | MKNK2 | RPS27A |  |  | MIR9-1 |  |
| 326 | MLH1 | RPTOR |  |  | MIR9-2 |  |
| 327 | MLLT11 | RRAGA |  |  | MIR9-3 |  |
| 328 | MMP9 | RRAGB |  |  | ISCU |  |
| 329 | MNT | RRAGC |  |  | OTUB1 |  |
| 330 | MOAP1 | RRAGD |  |  | CD44 |  |
| 331 | MPV17L | SLC38A9 |  |  | LINC00336 |  |
| 332 | MSH2 | SQSTM1 |  |  | BRD4 |  |
| 333 | MSH6 | SRC |  |  | PRDX6 |  |
| 334 | MSX1 | TOMM20 |  |  | MIR17 |  |
| 335 | MUC1 | TOMM22 |  |  | SESN2 |  |
| 336 | MUL1 | TOMM40 |  |  | NF2 |  |
| 337 | MYBBP1A | TOMM5 |  |  | ARNTL |  |
| 338 | MYC | TOMM6 |  |  | JUN |  |
| 339 | NACC2 | TOMM7 |  |  | CA9 |  |
| 340 | NANOS3 | TOMM70 |  |  | TMBIM4 |  |
| 341 | NBN | TSC1 |  |  | PLIN2 |  |
| 342 | NCK1 | TSC2 |  |  | MIR212 |  |
| 343 | NCK2 | TSG101 |  |  | Fer1HCH |  |
| 344 | NDUFA13 | TUBA1A |  |  | LAMP2 |  |
| 345 | NDUFS3 | TUBA1B |  |  | ZFP36 |  |
| 346 | NF1 | TUBA1C |  |  | PROM2 |  |
| 347 | NFATC4 | TUBA3C |  |  | CAV1 |  |
| 348 | NFE2L2 | TUBA3D |  |  | DAZAP1 |  |
| 349 | NGF | TUBA3E |  |  | PIR |  |
| 350 | NGFR | TUBA4A |  |  | HCAR1 |  |
| 351 | NKX3-1 | TUBA4B |  |  | SLC16A1 |  |
| 352 | NLE1 | TUBA8 |  |  | RRM2 |  |
| 353 | NME5 | TUBAL3 |  |  | NR4A1 |  |
| 354 | NMT1 | TUBB1 |  |  | RPTOR |  |
| 355 | NOC2L | TUBB2A |  |  | SREBF1 |  |
| 356 | NOG | TUBB2B |  |  | SREBF2 |  |
| 357 | NOL3 | TUBB3 |  |  | FZD7 |  |
| 358 | NONO | TUBB4A |  |  | P4HB |  |
| 359 | NOS3 | TUBB4B |  |  | NT5DC2 |  |
| 360 | NOX1 | TUBB6 |  |  | BCAT2 |  |
| 361 | NR4A2 | TUBB8 |  |  | PLA2G6 |  |
| 362 | NRP1 | TUBB8B |  |  | MIR424 |  |
| 363 | NUPR1 | UBA52 |  |  | PARK7 |  |
| 364 | OPA1 | UBAP1 |  |  | FXN |  |
| 365 | P2RX4 | UBB |  |  | SUV39H1 |  |
| 366 | P2RX7 | UBC |  |  | ATF2 |  |
| 367 | P4HB | UBE2N |  |  | ACOT1 |  |
| 368 | PAK2 | UBE2V1 |  |  | ALDH3A2 |  |
| 369 | PAK5 | ULK1 |  |  | STK11 |  |
| 370 | PARK7 | USP30 |  |  | FNDC5 |  |
| 371 | PARL | UVRAG |  |  | CircIL4R |  |
| 372 | PARP1 | VCP |  |  | CDH1 |  |
| 373 | PARP2 | VDAC1 |  |  | NEDD4L |  |
| 374 | PAWR | VIM |  |  | BRD2 |  |
| 375 | PCGF2 | VPS28 |  |  | BRD3 |  |
| 376 | PDCD10 | VPS37A |  |  | BRDT |  |
| 377 | PDCD5 | VPS37B |  |  | DECR1 |  |
| 378 | PDCD6 | VPS37C |  |  | GLRX5 |  |
| 379 | PDE3A | VPS37D |  |  | NCOA3 |  |
| 380 | PDIA3 | WDR45 |  |  | NR5A2 |  |
| 381 | PDK1 | WDR45B |  |  | PANX2 |  |
| 382 | PDK2 | WIPI1 |  |  | RHEBP1 |  |
| 383 | PDPK1 | WIPI2 |  |  | TFAP2A |  |
| 384 | PDX1 |  |  |  | ARF6 |  |
| 385 | PEA15 |  |  |  | GDF15 |  |
| 386 | PELI3 |  |  |  | ABHD12 |  |
| 387 | PERP |  |  |  | PPP1R13L |  |
| 388 | PF4 |  |  |  | TFAM |  |
| 389 | PHIP |  |  |  | KDM3B |  |
| 390 | PHLDA3 |  |  |  | RNF113A |  |
| 391 | PIAS4 |  |  |  | AHCY |  |
| 392 | PIDD1 |  |  |  | circ-TTBK2 |  |
| 393 | PIH1D1 |  |  |  | MIR522 |  |
| 394 | PIK3CB |  |  |  | IDH2 |  |
| 395 | PIK3R1 |  |  |  | PPARA |  |
| 396 | PINK1 |  |  |  | NOS2 |  |
| 397 | PLA2G6 |  |  |  | SIAH2 |  |
| 398 | PLAGL2 |  |  |  | RELA |  |
| 399 | PLAUR |  |  |  | VDR |  |
| 400 | PLEKHF1 |  |  |  | NEDD4 |  |
| 401 | PLSCR3 |  |  |  | PRDX1 |  |
| 402 | PMAIP1 |  |  |  | AR |  |
| 403 | PML |  |  |  | MTF1 |  |
| 404 | POLB |  |  |  | COPZ1 |  |
| 405 | POU4F1 |  |  |  | NUPR1 |  |
| 406 | POU4F2 |  |  |  | USP35 |  |
| 407 | PPARD |  |  |  | NEAT1 |  |
| 408 | PPIA |  |  |  | PARP1 |  |
| 409 | PPIF |  |  |  | PARP2 |  |
| 410 | PPM1F |  |  |  | PARP3 |  |
| 411 | PPP1CA |  |  |  | PARP4 |  |
| 412 | PPP1R13B |  |  |  | PARP6 |  |
| 413 | PPP1R15A |  |  |  | PARP8 |  |
| 414 | PPP2R1A |  |  |  | PARP9 |  |
| 415 | PPP2R1B |  |  |  | PARP10 |  |
| 416 | PRDX2 |  |  |  | PARP11 |  |
| 417 | PRELID1 |  |  |  | PARP12 |  |
| 418 | PRKCA |  |  |  | PARP14 |  |
| 419 | PRKCD |  |  |  | PARP15 |  |
| 420 | PRKDC |  |  |  | PARP16 |  |
| 421 | PRKN |  |  |  | PDSS2 |  |
| 422 | PRKRA |  |  |  | TXN |  |
| 423 | PRODH |  |  |  | SENP1 |  |
| 424 | PSEN1 |  |  |  | OIP5-AS1 |  |
| 425 | PSMD10 |  |  |  | MIR190A |  |
| 426 | PSME3 |  |  |  | FGF21 |  |
| 427 | PTEN |  |  |  | CREB1 |  |
| 428 | PTGIS |  |  |  | CREB3 |  |
| 429 | PTGS2 |  |  |  | CREB5 |  |
| 430 | PTH |  |  |  | MIR130B |  |
| 431 | PTPMT1 |  |  |  | BEX1 |  |
| 432 | PTPN1 |  |  |  | ASAH2 |  |
| 433 | PTPN2 |  |  |  | FABP4 |  |
| 434 | PTPRC |  |  |  | AKT1S1 |  |
| 435 | PTTG1IP |  |  |  | MLST8 |  |
| 436 | PYCARD |  |  |  | TYRO3 |  |
| 437 | QARS1 |  |  |  | SIRT6 |  |
| 438 | QRICH1 |  |  |  | TMSB4X |  |
| 439 | RACK1 |  |  |  | TMSB4Y |  |
| 440 | RAD9A |  |  |  | KIF20A |  |
| 441 | RAF1 |  |  |  | ECH1 |  |
| 442 | RB1 |  |  |  | circRHOT1 |  |
| 443 | RB1CC1 |  |  |  | ETV4 |  |
| 444 | RBCK1 |  |  |  | MEG8 |  |
| 445 | RELA |  |  |  | VCP |  |
| 446 | RET |  |  |  | circ_0007142 |  |
| 447 | RFFL |  |  |  | RBMS1 |  |
| 448 | RHOT1 |  |  |  | KDM4A |  |
| 449 | RHOT2 |  |  |  | MGST1 |  |
| 450 | RIPK1 |  |  |  | circKIF4A |  |
| 451 | RIPK3 |  |  |  | miR-7-5p |  |
| 452 | RNF183 |  |  |  | circ_0067934 |  |
| 453 | RNF186 |  |  |  | MPC1 |  |
| 454 | RNF34 |  |  |  | CHMP1A |  |
| 455 | RNF41 |  |  |  | CAMKK2 |  |
| 456 | RPL11 |  |  |  | SOX2 |  |
| 457 | RPL26 |  |  |  | SRSF9 |  |
| 458 | RPS27L |  |  |  | PROK2 |  |
| 459 | RPS3 |  |  |  | MIR4443 |  |
| 460 | RPS6KB1 |  |  |  | SIRT2 |  |
| 461 | RPS7 |  |  |  | circRNA1615 |  |
| 462 | RRM2B |  |  |  | MIR27A |  |
| 463 | RRN3 |  |  |  | MIR670 |  |
| 464 | RRP8 |  |  |  | MEF2C |  |
| 465 | RTKN2 |  |  |  | EZH2 |  |
| 466 | RTL10 |  |  |  | PEDS1 |  |
| 467 | S100A8 |  |  |  | ADAMTS13 |  |
| 468 | S100A9 |  |  |  | CDC25A |  |
| 469 | SCG2 |  |  |  | SFRS9 |  |
| 470 | SCN2A |  |  |  | CAV |  |
| 471 | SCRT2 |  |  |  | CircFNDC3B |  |
| 472 | SELENOK |  |  |  | PPARD |  |
| 473 | SELENOS |  |  |  | ENO3 |  |
| 474 | SENP1 |  |  |  | LCN2 |  |
| 475 | SEPTIN4 |  |  |  | MARCHF5 |  |
| 476 | SERINC3 |  |  |  | TRIB2 |  |
| 477 | SERPINE1 |  |  |  | DHODH |  |
| 478 | SFN |  |  |  | MIR545 |  |
| 479 | SFPQ |  |  |  | PDK4 |  |
| 480 | SFRP1 |  |  |  | CircPVT1 |  |
| 481 | SFRP2 |  |  |  | MIR9-3HG |  |
| 482 | SGK3 |  |  |  | ADIPOQ |  |
| 483 | SGMS1 |  |  |  | circDTL |  |
| 484 | SGPL1 |  |  |  | mmu_circRNA_0000309 |  |
| 485 | SGPP1 |  |  |  | PTPN18 |  |
| 486 | SH3RF1 |  |  |  | ABCC5 |  |
| 487 | SHH |  |  |  | CISD3 |  |
| 488 | SHISA5 |  |  |  | MS4A15 |  |
| 489 | SIAH1 |  |  |  | FURIN |  |
| 490 | SIAH2 |  |  |  | circRHBG |  |
| 491 | SIRT1 |  |  |  | GALNT14 |  |
| 492 | SIVA1 |  |  |  | KLHDC3 |  |
| 493 | SKIL |  |  |  | LINC01833 |  |
| 494 | SLC25A31 |  |  |  | circGFRA1 |  |
| 495 | SLC25A4 |  |  |  | MAPKAP1 |  |
| 496 | SLC25A5 |  |  |  | PRR5 |  |
| 497 | SLC25A6 |  |  |  | RICTOR |  |
| 498 | SLC35F6 |  |  |  | GSTM1 |  |
| 499 | SLC9A3R1 |  |  |  | TERT |  |
| 500 | SLFN12 |  |  |  | circ0097009 |  |
| 501 | SMAD3 |  |  |  | TMEM161B-DT |  |
| 502 | SNAI1 |  |  |  | circEPSTI1 |  |
| 503 | SNAI2 |  |  |  | MIR18A |  |
| 504 | SNW1 |  |  |  | RARRES2 |  |
| 505 | SOD1 |  |  |  | PTGS2 |  |
| 506 | SOD2 |  |  |  |  |  |
| 507 | SORT1 |  |  |  |  |  |
| 508 | SP100 |  |  |  |  |  |
| 509 | SPI1 |  |  |  |  |  |
| 510 | SRC |  |  |  |  |  |
| 511 | SRPX |  |  |  |  |  |
| 512 | SST |  |  |  |  |  |
| 513 | SSTR3 |  |  |  |  |  |
| 514 | ST20 |  |  |  |  |  |
| 515 | STK11 |  |  |  |  |  |
| 516 | STK24 |  |  |  |  |  |
| 517 | STK25 |  |  |  |  |  |
| 518 | STK3 |  |  |  |  |  |
| 519 | STK4 |  |  |  |  |  |
| 520 | STRADB |  |  |  |  |  |
| 521 | STX4 |  |  |  |  |  |
| 522 | STYXL1 |  |  |  |  |  |
| 523 | SYVN1 |  |  |  |  |  |
| 524 | TAF9 |  |  |  |  |  |
| 525 | TAF9B |  |  |  |  |  |
| 526 | TCF7L2 |  |  |  |  |  |
| 527 | TERT |  |  |  |  |  |
| 528 | TFPT |  |  |  |  |  |
| 529 | TGFB1 |  |  |  |  |  |
| 530 | TGFB2 |  |  |  |  |  |
| 531 | TGFBR1 |  |  |  |  |  |
| 532 | THBS1 |  |  |  |  |  |
| 533 | TICAM1 |  |  |  |  |  |
| 534 | TIMM50 |  |  |  |  |  |
| 535 | TIMP3 |  |  |  |  |  |
| 536 | TLR3 |  |  |  |  |  |
| 537 | TM2D1 |  |  |  |  |  |
| 538 | TMBIM1 |  |  |  |  |  |
| 539 | TMBIM6 |  |  |  |  |  |
| 540 | TMC8 |  |  |  |  |  |
| 541 | TMEM102 |  |  |  |  |  |
| 542 | TMEM109 |  |  |  |  |  |
| 543 | TMEM117 |  |  |  |  |  |
| 544 | TMEM14A |  |  |  |  |  |
| 545 | TMEM161A |  |  |  |  |  |
| 546 | TNF |  |  |  |  |  |
| 547 | TNFAIP3 |  |  |  |  |  |
| 548 | TNFRSF10A |  |  |  |  |  |
| 549 | TNFRSF10B |  |  |  |  |  |
| 550 | TNFRSF10C |  |  |  |  |  |
| 551 | TNFRSF12A |  |  |  |  |  |
| 552 | TNFRSF1A |  |  |  |  |  |
| 553 | TNFRSF1B |  |  |  |  |  |
| 554 | TNFRSF25 |  |  |  |  |  |
| 555 | TNFSF10 |  |  |  |  |  |
| 556 | TNFSF11 |  |  |  |  |  |
| 557 | TNFSF12 |  |  |  |  |  |
| 558 | TOPORS |  |  |  |  |  |
| 559 | TP53 |  |  |  |  |  |
| 560 | TP53BP2 |  |  |  |  |  |
| 561 | TP63 |  |  |  |  |  |
| 562 | TP73 |  |  |  |  |  |
| 563 | TPD52L1 |  |  |  |  |  |
| 564 | TPT1 |  |  |  |  |  |
| 565 | TRADD |  |  |  |  |  |
| 566 | TRAF1 |  |  |  |  |  |
| 567 | TRAF2 |  |  |  |  |  |
| 568 | TRAF7 |  |  |  |  |  |
| 569 | TRAP1 |  |  |  |  |  |
| 570 | TREM2 |  |  |  |  |  |
| 571 | TRIAP1 |  |  |  |  |  |
| 572 | TRIB3 |  |  |  |  |  |
| 573 | TRIM32 |  |  |  |  |  |
| 574 | TRIM39 |  |  |  |  |  |
| 575 | TXNDC12 |  |  |  |  |  |
| 576 | TYROBP |  |  |  |  |  |
| 577 | UACA |  |  |  |  |  |
| 578 | UBB |  |  |  |  |  |
| 579 | UBE4B |  |  |  |  |  |
| 580 | UBQLN1 |  |  |  |  |  |
| 581 | UMOD |  |  |  |  |  |
| 582 | UNC5B |  |  |  |  |  |
| 583 | URI1 |  |  |  |  |  |
| 584 | USP28 |  |  |  |  |  |
| 585 | USP47 |  |  |  |  |  |
| 586 | VDAC2 |  |  |  |  |  |
| 587 | VNN1 |  |  |  |  |  |
| 588 | WFS1 |  |  |  |  |  |
| 589 | WNT4 |  |  |  |  |  |
| 590 | WWOX |  |  |  |  |  |
| 591 | XBP1 |  |  |  |  |  |
| 592 | YAP1 |  |  |  |  |  |
| 593 | YBX3 |  |  |  |  |  |
| 594 | ZC3HC1 |  |  |  |  |  |
| 595 | ZDHHC3 |  |  |  |  |  |
| 596 | ZMYND11 |  |  |  |  |  |
| 597 | ZNF205 |  |  |  |  |  |
| 598 | ZNF385A |  |  |  |  |  |
| 599 | ZNF385B |  |  |  |  |  |
| 600 | ZNF622 |  |  |  |  |  |
| 601 | ZSWIM2 |  |  |  |  |  |
